# Supplementary material for: Defect chemical studies on oxygen release from the Li-rich cathode material Li1.2Mn0.6Ni0.2O2−δ
Source: Royal Society of Chemistry journal article supplement (doi:10.1039/c8ta12484a), 2019-01-01
Supplement: c8ta12484a1.pdf [file c8ta12484a1.pdf]

**Supporting information of  
Defect chemical studies on oxygen release of Li-rich cathode material**

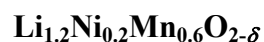

Takashi Nakamura<sup>1\*</sup>, Hongze Gao<sup>2</sup>, Kento Ohta<sup>2</sup>, Yuta Kimura<sup>1</sup>, Yusuke Tamenori<sup>3</sup>,  
Kiyofumi Nitta<sup>3</sup>, Toshiaki Ina<sup>3</sup>, Masatsugu Oishi<sup>4</sup>, Koji Amezawa<sup>1</sup>

<sup>1</sup>Institute of Multidisciplinary Research for Advanced Materials, Tohoku University  
2-1-1 Katahira, Aoba-ku, Sendai, 980-8577 Japan

<sup>2</sup>Graduate School of Engineering, Tohoku University  
6-6-1 Aramaki-Aoba, Aoba-ku, Sendai 980-8579, Japan

<sup>3</sup>Japan Synchrotron Radiation Institute  
1-1-1, Kouto, Sayo-cho, Sayo-gun, Hyogo 679-5198, Japan.

<sup>4</sup> Graduate School of Technology, Tokushima University  
2-1, Minamijosanji-machi, Tokushima, 770-8506, Japan

## Experimental

### Battery test of the pristine $\text{Li}_{1.2}\text{Ni}_{0.2}\text{Mn}_{0.6}\text{O}_2$

The cathode slurry was made by mixing  $\text{Li}_{1.2}\text{Ni}_{0.2}\text{Mn}_{0.6}\text{O}_2$  : AB : PVDF = 80 : 10 : 10 and adding a small amount of 1-methyl-2-pyrrolidone. The slurry was printed on an Al foil current collector by using a film applicator (Automatic film applicator 542-AB4, YASUDA SEIKI SEISAKUSHO, LTD.). The cathode slurry was dried in an oven at 353 K for more than 24 h. The thickness of the composite cathode layer was about 50  $\mu\text{m}$ . The composite electrode was cut into 13 mm in diameter. An electrochemical cell was fabricated in a glovebox with an Li metal foil (Honjo Metal Co., Ltd.) as an anode, EC-DMC with 1 mol L<sup>-1</sup> of LiPF<sub>6</sub> (EC:DMC = 3:7 in volume, Kishida Chemical Co., Ltd.) as an electrolyte, a polymer separator (Cell-Gard #2500, Polypore International, Inc.), and the composite cathode. After the fabrication, the cell was kept for more than 3 h for ensuring the sufficient infiltration of the liquid electrolyte into the electrode. Thereafter, the charge-discharge test was carried out in a voltage range 2.0-4.8 V with 10 mA g<sup>-1</sup>.

### Statistical thermodynamic model for $\text{Li}_{1.2}\text{Ni}_{0.2}\text{Mn}_{0.6}\text{O}_{2-\delta}$

Statistical thermodynamic is established by considering the defect equilibrium. As is the defect chemical model, defect species are treated as pseudo-chemical species. Then, Gibbs free energy of the system,  $G$ , is expressed by

$$G = \sum_i \chi_i \mu_i^\circ + \sum_i \chi_i RT \ln \gamma_i \chi_i \quad (\text{S1})$$

where  $\chi_i$ ,  $\mu_i^\circ$ ,  $R$ ,  $T$ , and  $\gamma_i$  are the molar fraction of  $i$ , the standard chemical potential of  $i$ , the gas constant, the temperature, and the activity coefficient of  $i$ , respectively. Oxygen chemical potential,  $\mu_o$ , is the derivation of  $G$  with oxygen content

$$\mu_o = \frac{\partial G}{\partial(2-\delta)} = -\frac{\partial}{\partial\delta} \left( \sum_i \chi_i \mu_i^\circ + \frac{\partial}{\partial\delta} \right) \quad (\text{S2})$$

$$\mu_o = -\sum_i \frac{\partial \chi_i}{\partial \delta} \mu_i^\circ - RT \sum_i \frac{\partial \chi_i}{\partial \delta} \ln \gamma_i - RT \frac{\partial}{\partial \delta} \sum_i \chi_i \ln \chi_i \quad (\text{S3})$$

Here, configurational entropy in  $\text{Li}_{1.2}\text{Ni}_{0.2}\text{Mn}_{0.6}\text{O}_{2-\delta}$  is calculated assuming the imaginary transition metal  $M$  as introduced into the defect equilibrium model.

$$S_o(conf) = k \left[ \ln \left( \frac{N_A!}{(\chi_{M_{TM}} \times N_A)! (\chi_{Mn_{TM}} \cdot N_A)!} \right) + \ln \left( \frac{(2N_A)!}{(\chi_{O \times O} \times N_A)! (\chi_{V \cdot O} \cdot N_A)!} \right) \right] \quad (S4)$$

where  $k$  and  $N_A$  are the Boltzmann constant and the Avogadro number. Partial molar entropy of the configuration,  $s_o(conf)$ , is obtained by the derivation of  $S_o(conf)$  with the oxygen content. Considering the relations  $R = kN_A$  and the Stirling's formula,  $s_o(conf)$  can be expressed by

$$s_o(conf) = \frac{\partial S_o(conf)}{\partial(2-\delta)} = R \frac{\partial}{\partial \delta} \sum_i \chi_i \ln \chi_i \quad (S5)$$

Eq. S5 times  $T$  is exactly the same to the 3<sup>rd</sup> term in the Eq. S3. Then,  $\mu_o$  can be expressed by

$$\mu_o = - \sum_i \frac{\partial \chi_i}{\partial \delta} \mu_i^o - RT \sum_i \frac{\partial \chi_i}{\partial \delta} \ln \gamma_i - T s_o(conf) \quad (S6)$$

The parameters in the defect chemical analysis are introduced into the statistical thermodynamic model.

$$\Delta G_{OX}^{\circ} = \mu_{V_O}^{\circ} + 2\mu_{M_{TM}}^{\circ} - \mu_{O_O}^{\circ} - 2\mu_{M_{TM}^{\times}}^{\circ} + \mu_O^{\circ} \quad (S7)$$

From Eqs. S7 and 16 in the main text, S6 can be converted as follows

$$\mu_O - \mu_O^{\circ} = -\Delta G_{OX}^{\circ} - \Delta H_{ex} - Ts_O(conf) \quad (S8)$$

Theoretical value of partial molar enthalpy and entropy,  $h_O - h_O^{\circ}$  and  $s_O - s_O^{\circ}$ , can be calculated from the results of the defect chemical analysis.

$$h_O - h_O^{\circ} = -\Delta H_{OX}^{\circ} - \Delta H_{ex} \quad (S9)$$

$$s_O - s_O^{\circ} = -\Delta S_{OX}^{\circ} + s_O(conf) \quad (S10)$$

Supplemental figures and tables

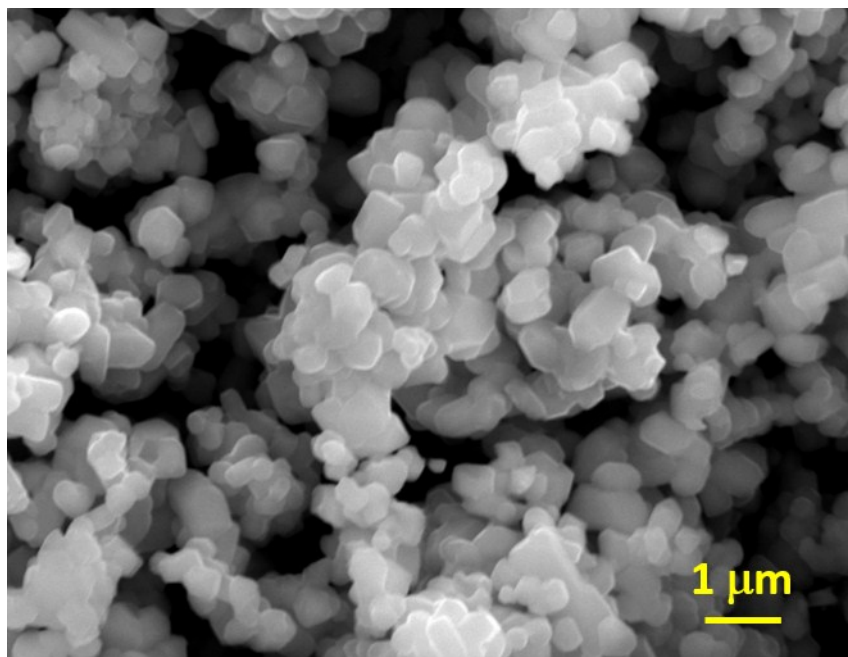

Figure S1. SEM image of the pristine  $\text{Li}_{1.2}\text{Ni}_{0.2}\text{Mn}_{0.6}\text{O}_2$  particles.

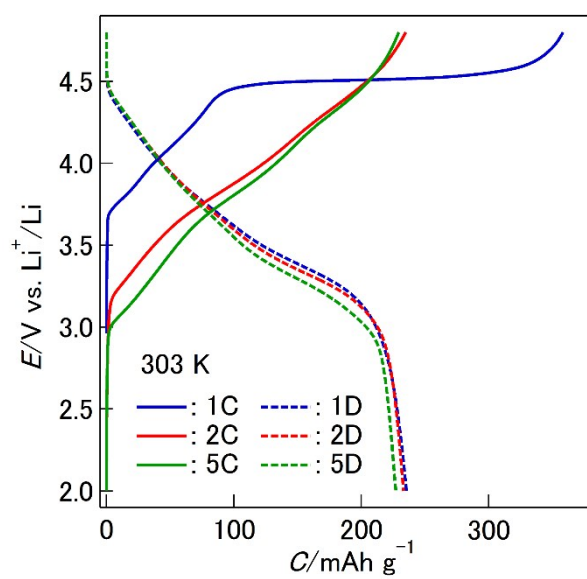

Figure S2. Charge-discharge curves of the pristine  $Li_{1.2}Ni_{0.2}Mn_{0.6}O_2$  composite cathode.

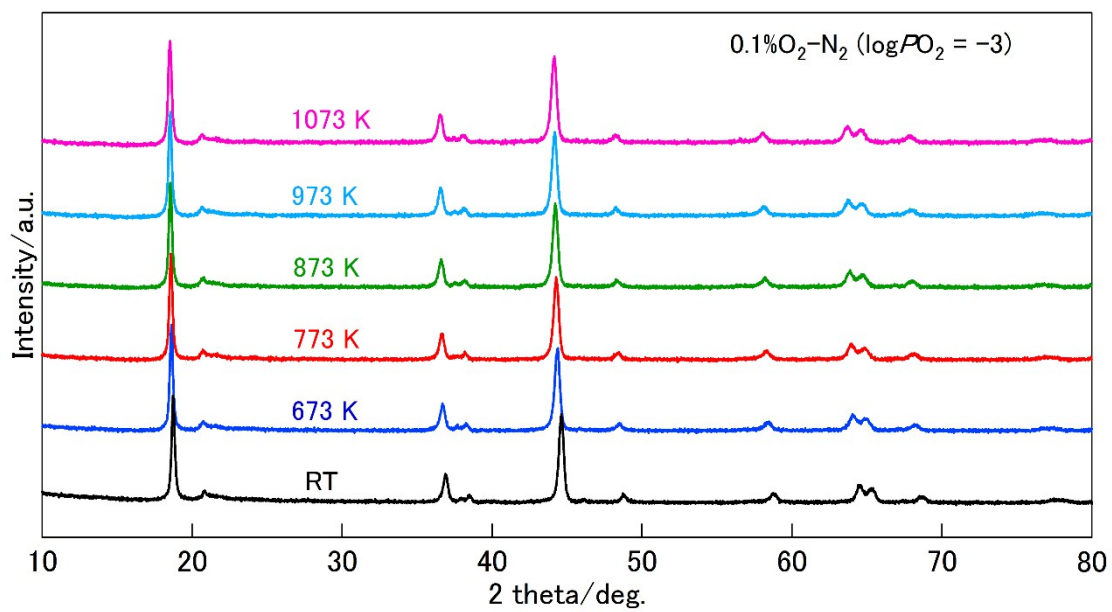

Figure S3. XRD patterns of the pristine  $\text{Li}_{1.2}\text{Ni}_{0.2}\text{Mn}_{0.6}\text{O}_2$  measured at different temperatures in  $0.1\% \text{O}_2\text{-N}_2$ .



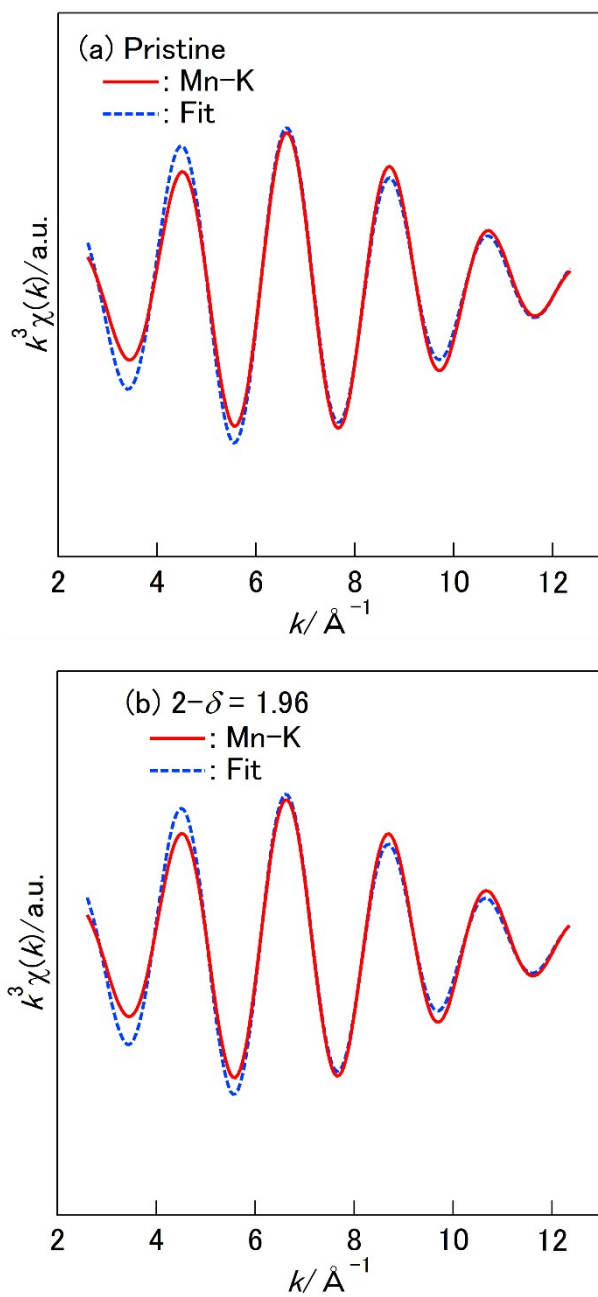

Figure S4.  $k^3$  weighted signals from EXAFS of Mn-K edge spectra of (a) the pristine sample and (b) the oxygen extracted sample. The dashed lines are the fitting lines of the EXAFS analysis.

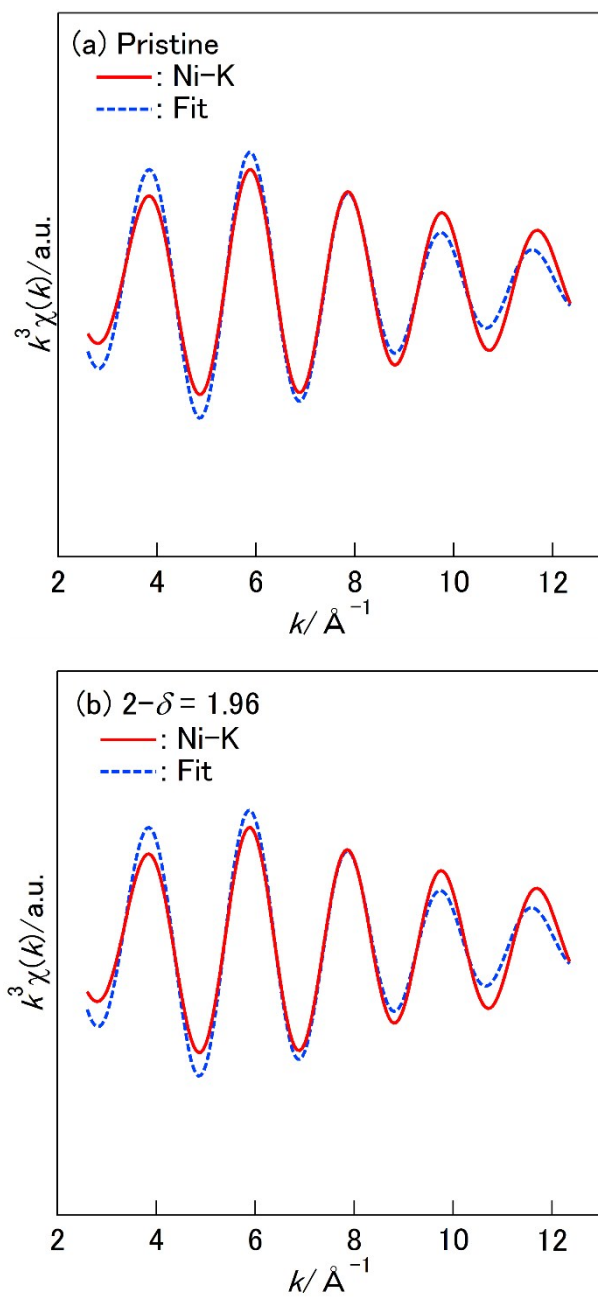

Figure S5.  $k^3$  weighted signals from EXAFS of Ni-K edge spectra of (a) the pristine sample and (b) the oxygen extracted sample. The dashed lines are the fitting lines of the EXAFS analysis.

Table S1. Molar ratio of  $\text{Li}_{1.2}\text{Ni}_{0.2}\text{Mn}_{0.6}\text{O}_{2-\delta}$  determined by ICP-OES.

|                                | Li   | Mn   | Ni   | Li/(Mn+Ni) |
|--------------------------------|------|------|------|------------|
| Pristine                       | 1.26 | 0.60 | 0.20 | 1.58       |
| Reduced<br>( $2-\delta=1.96$ ) | 1.22 | 0.60 | 0.19 | 1.54       |

Table S2. EXAFS parameters, the coordination number ( $N$ ), the Debye-Waller factor ( $\sigma^2$ ),

and the energy shift ( $\Delta E$ ), respectively.

|      |          | $N$ (fixed) | $\sigma^2$        | $\Delta E$      | $R$ value |
|------|----------|-------------|-------------------|-----------------|-----------|
| Mn-O | pristine | 6           | $0.079 \pm 0.008$ | $-7.2 \pm 1.8$  | 2.290     |
|      | reduced  | 5.88        | $0.081 \pm 0.008$ | $-6.0 \pm 1.8$  | 2.176     |
| Ni-O | pristine | 6           | $0.082 \pm 0.008$ | $-11.4 \pm 1.8$ | 3.073     |
|      | reduced  | 5.88        | $0.083 \pm 0.008$ | $-11.6 \pm 1.8$ | 5.436     |
